# Supplementary material
Source: MDPI journal article supplement (https://www.mdpi.com/2073-4441/14/5/791)
Supplement: s1 [file s1]

*Research paper*

# **Impact of wastewater quality and Flow Characteristics on H<sub>2</sub>S emission generation: Statistical correlations and artificial neural network model**

**Mohsina Sherief<sup>1</sup>, Ashraf Aly Hassan<sup>1,\*</sup>**

1 Civil and Environmental Engineering and the National Water and Energy Center, United Arab Emirates University, Al Ain, UAE, 201970096@uaeu.ac.ae and alyhassan@uaeu.ac.ae

\* Correspondence: alyhassan@uaeu.ac.ae; Tel.: +971-(03)-713-5334; Fax: +971-(03)-713-4343

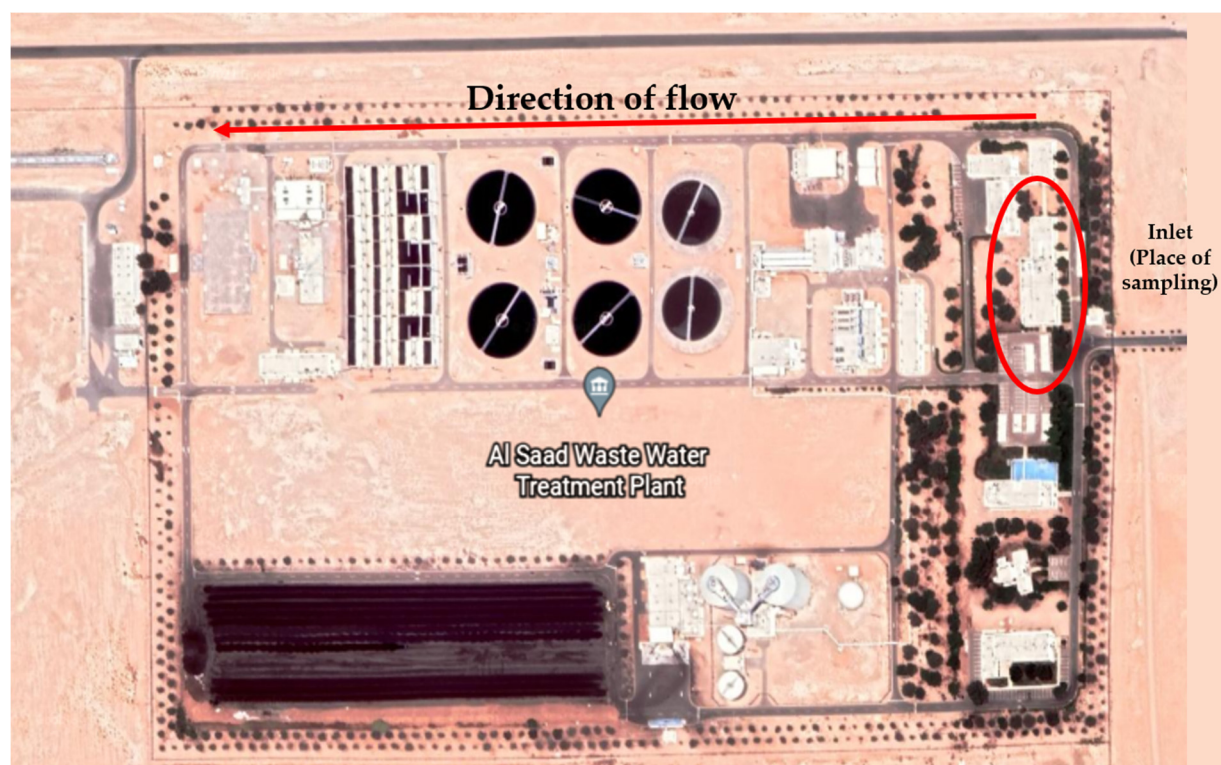

**Figure S1.** Aerial view of Al Saad wastewater treatment plant with the sampling area encircled. The arrow shows the direction of flow of wastewater in various treatment units.

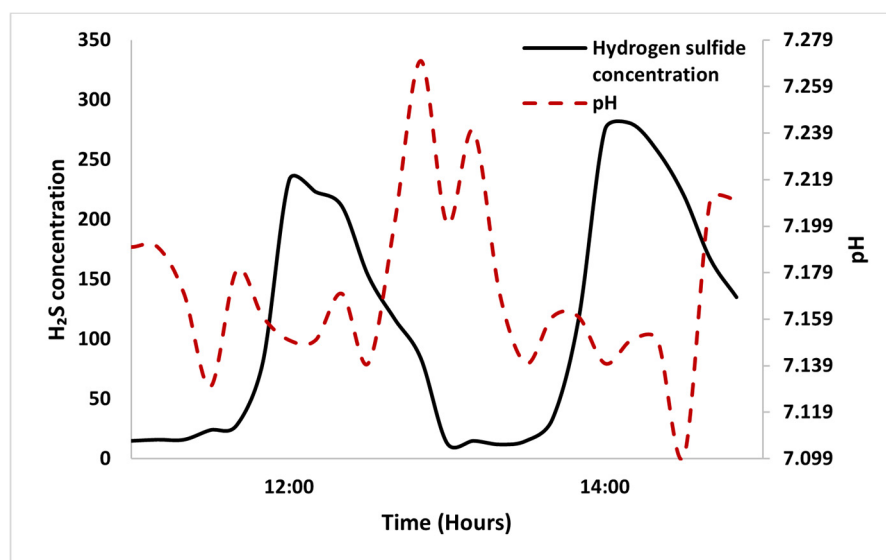

**Figure S2.** H<sub>2</sub>S concentration and pH levels at different times of measurements.

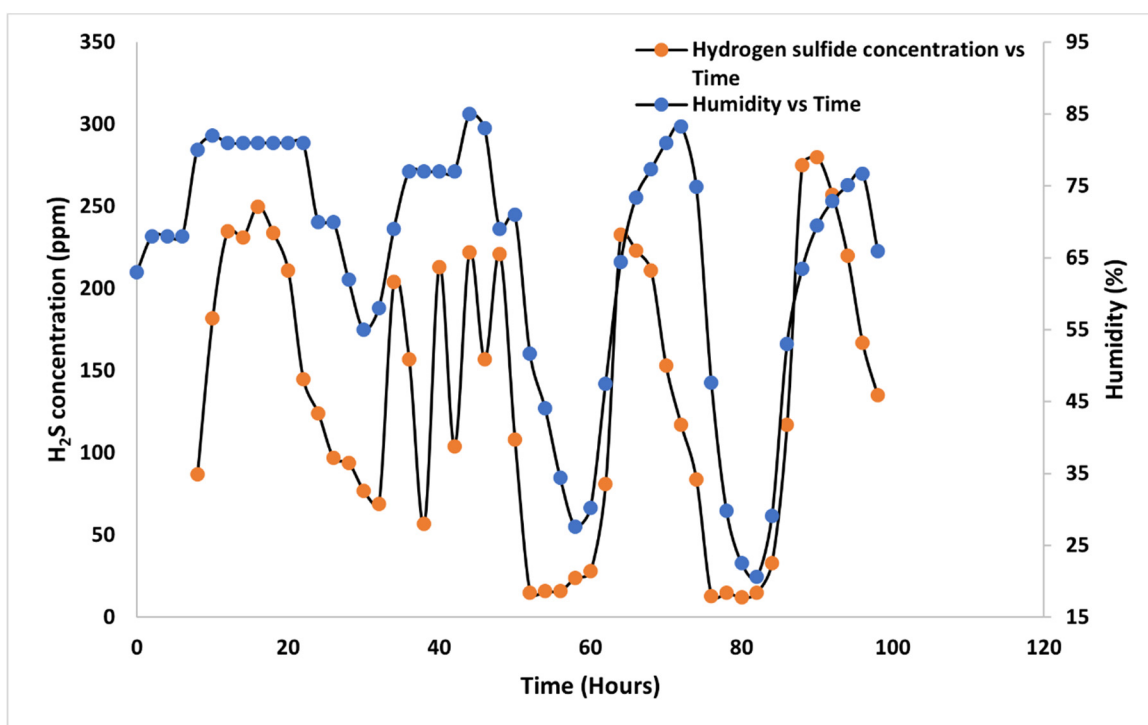

**Figure S3.** H<sub>2</sub>S concentration and Humidity at different times of measurement.
